# Supplementary material for: Antibody responses to flagellin C and Streptococcus gallolyticus pilus proteins in colorectal cancer
Source: PubMed Central journal article supplement (PMC6659640; doi:10.1038/s41598-019-47347-6), 2019-07-26
Supplement: 41598_2019_47347_MOESM1_ESM.pdf [file 41598_2019_47347_MOESM1_ESM.pdf]

Supplementary tables S1, S2, and S3

Manuscript title: Antibody responses to flagellin C and *Streptococcus gallolyticus* pilus proteins in colorectal cancer

| Authors                                                                                                                                                                                                                                                                                                                                                                                                                                  |
|------------------------------------------------------------------------------------------------------------------------------------------------------------------------------------------------------------------------------------------------------------------------------------------------------------------------------------------------------------------------------------------------------------------------------------------|
| Julia Butt, Nerea Fernández de Larrea, Harold Tjalsma, Rian Roelofs, Ikuko Kato, Vicente Martín, Beatriz Pérez-Gómez, Víctor Moreno, Trinidad Dierssen-Sotos, Jesús Castilla, Guillermo Fernández-Tardón, Pilar Amiano, Dolores Salas, Juan Alguacil, José Juan Jiménez-Moleón, José María Huerta, Silvia de Sanjosé, Rosa del Campo, Manolis Kogevinas, Marina Pollán, Michael Pawlita, Tim Waterboer, Annemarie Boleij, Nuria Aragonés |

**Supplementary table S1: MCC-Spain study population characteristics**

|                                 | Controls   | Cases      |
|---------------------------------|------------|------------|
| Overall, n (%)                  | 576 (100)  | 576 (100)  |
| Age [years], mean (range)       | 64 (35-84) | 64 (31-85) |
| Sex, n (%)                      |            |            |
| Males                           | 286 (50)   | 285 (50)   |
| Females                         | 290 (50)   | 291 (50)   |
| Education, n (%)                |            |            |
| Low                             | 313 (54)   | 371 (64)   |
| Intermediate                    | 156 (27)   | 136 (24)   |
| High                            | 107 (18)   | 69 (12)    |
| Smoking status, n (%)           |            |            |
| Never                           | 293 (51)   | 258 (45)   |
| Former                          | 166 (29)   | 209 (37)   |
| Current                         | 113 (19)   | 105 (18)   |
| Missing                         | 4          | 4          |
| BMI [kg/m <sup>2</sup> ], n (%) |            |            |
| <25                             | 161 (28)   | 165 (29)   |
| 25- <30                         | 274 (48)   | 247 (43)   |
| ≥30                             | 141 (24)   | 164 (28)   |
| Family history of CRC, n (%)    |            |            |
| No                              | 518 (89)   | 476 (82)   |
| Yes                             | 58 (10)    | 100 (17)   |

BMI: Body mass index; CRC = colorectal cancer

**Supplementary table S2: Association of antibody response to FliC with adenoma/CRC in the Nijmegen/Detroit studies, separately by study**

| Nijmegen |             |                |                          |                          |                    |
|----------|-------------|----------------|--------------------------|--------------------------|--------------------|
| FliC     | Total n (%) | Controls n (%) | Cases <sup>1</sup> n (%) | OR (95%CI) <sup>2</sup>  | P <sub>trend</sub> |
| Q1       | 21 (28)     | 7 (26)         | 14 (28)                  | ref                      |                    |
| Q2       | 12 (16)     | 7 (26)         | 5 (16)                   | 0.36 (0.08-1.54)         |                    |
| Q3       | 15 (20)     | 6 (22)         | 9 (20)                   | 0.75 (0.19-2.97)         |                    |
| Q4       | 28 (37)     | 7 (26)         | 21 (37)                  | 1.50 (0.43-5.22)         | 0.242              |
| Detroit  |             |                |                          |                          |                    |
| FliC     | Total n (%) | Controls n (%) | Cases <sup>1</sup> n (%) | OR (95%CI) <sup>2</sup>  | P <sub>trend</sub> |
| Q1       | 17 (19)     | 12 (26)        | 5 (11)                   | ref                      |                    |
| Q2       | 17 (19)     | 12 (26)        | 5 (21)                   | 1.00 (0.23-4.37)         |                    |
| Q3       | 22 (24)     | 11 (23)        | 11 (25)                  | 2.40 (0.63-9.14)         |                    |
| Q4       | 35 (38)     | 12 (26)        | 23 (52)                  | <b>4.60 (1.31-16.14)</b> | <b>0.025</b>       |

<sup>1</sup>Cases include n=12 adenoma and n=37 CRC cases for Nijmegen; and n=11 adenoma and n=33 CRC cases in the Detroit study; <sup>2</sup>Logistic regression model without adjustments; Age and sex were available but only for part of the study; significant associations (p-value < 0.05) are marked in bold font

**Supplementary table S3: Antibody response to FliC and association with SGG Gallo2178 and Gallo2179 antibody positivity in the Nijmegen/Detroit studies, separately by study**

| Nijmegen                 |           |         |                      |           |         |                      |
|--------------------------|-----------|---------|----------------------|-----------|---------|----------------------|
| FliC quartile            | Gallo2178 |         |                      | Gallo2179 |         |                      |
|                          | neg       | pos     | p-value <sup>2</sup> | neg       | pos     | p-value <sup>2</sup> |
| <b>Total</b>             | (n=70)    | (n=6)   |                      | (n=68)    | (n=8)   |                      |
| Q1                       | 19 (27)   | 2 (33)  |                      | 18 (27)   | 3 (38)  |                      |
| Q2                       | 12 (17)   | 0 (0)   |                      | 12 (18)   | 0 (0)   |                      |
| Q3                       | 12 (17)   | 3 (50)  |                      | 10 (15)   | 5 (63)  |                      |
| Q4                       | 27 (39)   | 1 (17)  | 0.183                | 28 (41)   | 0 (0)   | <b>0.004</b>         |
| <b>Controls</b>          | (n=23)    | (n=4)   |                      | (n=22)    | (n=5)   |                      |
| Q1                       | 5 (22)    | 2 (50)  |                      | 4 (18)    | 3 (60)  |                      |
| Q2                       | 7 (30)    | 0 (0)   |                      | 7 (32)    | 0 (0)   |                      |
| Q3                       | 5 (22)    | 1 (25)  |                      | 4 (18)    | 2 (40)  |                      |
| Q4                       | 6 (26)    | 1 (25)  | 0.515                | 7 (32)    | 0 (0)   | 0.078                |
| <b>Cases<sup>1</sup></b> | (n=47)    | (n=2)   |                      | (n=46)    | (n=3)   |                      |
| Q1                       | 14 (30)   | 0 (0)   |                      | 14 (30)   | 0 (0)   |                      |
| Q2                       | 5 (11)    | 0 (0)   |                      | 5 (11)    | 0 (0)   |                      |
| Q3                       | 7 (15)    | 2 (100) |                      | 6 (13)    | 3 (100) |                      |
| Q4                       | 21 (45)   | 0 (0)   | <b>0.026</b>         | 21 (46)   | 0 (0)   | <b>0.003</b>         |
| Detroit                  |           |         |                      |           |         |                      |
| FliC quartile            | Gallo2178 |         |                      | Gallo2179 |         |                      |
|                          | neg       | pos     | p-value <sup>2</sup> | neg       | pos     | p-value <sup>2</sup> |
| <b>Total</b>             | (n=80)    | (n=11)  |                      | (n=83)    | (n=8)   |                      |
| Q1                       | 17 (21)   | 0 (0)   |                      | 17 (21)   | 0 (0)   |                      |
| Q2                       | 15 (19)   | 2 (18)  |                      | 16 (19)   | 1 (13)  |                      |
| Q3                       | 17 (21)   | 5 (46)  |                      | 19 (23)   | 3 (38)  |                      |
| Q4                       | 31 (39)   | 4 (36)  | 0.195                | 31 (37)   | 4 (50)  | 0.429                |
| <b>Controls</b>          | (n=42)    | (n=5)   |                      | (n=44)    | (n=3)   |                      |
| Q1                       | 12 (29)   | 0 (0)   |                      | 12 (27)   | 0 (0)   |                      |
| Q2                       | 11 (26)   | 1 (20)  |                      | 11 (25)   | 1 (33)  |                      |
| Q3                       | 9 (21)    | 2 (40)  |                      | 10 (23)   | 1 (33)  |                      |
| Q4                       | 10 (24)   | 2 (40)  | 0.455                | 11 (25)   | 1 (33)  | 0.776                |
| <b>Cases<sup>1</sup></b> | (n=38)    | (n=6)   |                      | (n=39)    | (n=5)   |                      |
| Q1                       | 5 (13)    | 0 (0)   |                      | 5 (13)    | 0 (0)   |                      |
| Q2                       | 4 (11)    | 1 (17)  |                      | 5 (13)    | 0 (0)   |                      |
| Q3                       | 8 (21)    | 3 (50)  |                      | 9 (23)    | 2 (40)  |                      |
| Q4                       | 21 (55)   | 2 (33)  | 0.365                | 20 (51)   | 3 (60)  | 0.603                |

<sup>1</sup>Cases include n=12 adenoma and n=37 CRC cases for Nijmegen; and n=11 adenoma and n=33 CRC cases in the Detroit study; <sup>2</sup>Chi-square test; significant associations (p-value < 0.05) are marked in bold font
